# Supplementary material
Source: PubMed Central journal article supplement (PMC3809150)
Supplement: NIHMS486330-supplement-01.pdf [file NIHMS486330-supplement-01.pdf]

**Table S1.** Search Strategy and Terms

| Electronic Database              | Search Terms                                                                                                                                                                                                                                                                                                                                                                                                                                                                                                                                                                                                                                                                                                                                                                                                                                                                                                                                                                                                                                                                                                                                                                                                                                                                                                                                                                                                                                                                                                                                                                                                                                                                                                                                                                                                                                                                                                                                                                                                      |
|----------------------------------|-------------------------------------------------------------------------------------------------------------------------------------------------------------------------------------------------------------------------------------------------------------------------------------------------------------------------------------------------------------------------------------------------------------------------------------------------------------------------------------------------------------------------------------------------------------------------------------------------------------------------------------------------------------------------------------------------------------------------------------------------------------------------------------------------------------------------------------------------------------------------------------------------------------------------------------------------------------------------------------------------------------------------------------------------------------------------------------------------------------------------------------------------------------------------------------------------------------------------------------------------------------------------------------------------------------------------------------------------------------------------------------------------------------------------------------------------------------------------------------------------------------------------------------------------------------------------------------------------------------------------------------------------------------------------------------------------------------------------------------------------------------------------------------------------------------------------------------------------------------------------------------------------------------------------------------------------------------------------------------------------------------------|
| <b>PubMed</b>                    | <p>((("kidney transplantation"[MeSH Terms] OR "kidney transplantation"[tiab] OR "kidney transplantations"[tiab] OR "kidney transplant"[tiab] OR "kidney transplants"[tiab] OR "renal transplant"[tiab] OR "renal transplants"[tiab] OR "renal transplantation"[tiab] OR "renal transplantations"[tiab] OR "renal graft"[tiab] OR "renal grafts"[tiab] OR "renal grafting"[tiab] OR "kidney graft"[tiab] OR "laparoscopic nephrectomy"[tiab] OR "kidney grafts"[tiab] OR "kidney grafting"[tiab] OR "kidney donation"[tiab] OR "kidney donations"[tiab] OR "kidney donor"[tiab] OR "kidney donors"[tiab] OR "kidney recipient"[tiab] OR "kidney recipients"[tiab] OR ("kidney"[tiab] AND "posttransplant"[tiab] ) OR ("kidney"[tiab] AND "posttransplanted"[tiab] ) OR ("kidney"[tiab] AND "posttransplantation"[tiab] ) OR ("kidney"[tiab] AND "posttransplantations"[tiab] ) OR ("kidney"[tiab] AND "post-transplantation"[tiab] ) OR ("kidney"[tiab] AND "post-transplant"[tiab] ) OR ("kidney"[tiab] AND "post-transplants"[tiab] ) ) OR ("hemodialysis"[tiab] OR "hemodialyses"[tiab]) OR ("peritoneal dialysis"[MeSH Term] OR "Peritoneal Dialysis, Continuous Ambulatory"[MeSH Terms] OR "peritoneal dialysis"[tiab])) AND (("Activities of Daily Living"[MeSH] or "ADL"[tiab] or "IADL"[tiab] or "activities of daily living"[tiab] or "dailing living activities"[tiab] or "daily living activity"[tiab] or "limitation of activity"[tiab] or "physical function"[tiab] or "physical functioning"[tiab] or "physical activity"[tiab] OR "travel"[tiab] or "Transportation"[tiab] OR "recreation"[tiab] or "social participation"[tiab] or "leisure"[tiab] OR "employment"[MesH] or "employment"[tiab] or "work"[tiab] or "working capacity"[tiab] or "job"[tiab] or "jobs"[tiab] OR "Freedom"[tiab] OR "quality of life"[MeSH Major Topic] or "quality of life"[tiab] or "SF-36"[tiab] or "HRQL"[tiab]))) AND ("humans"[MeSH Terms] AND English[lang] AND "adult"[MeSH Terms]) NOT Case Reports[ptyp]</p> |
| <b>Cochrane Library (Trials)</b> | <p>MeSH descriptor: [Kidney Transplantation] explode all trees OR MeSH descriptor: [Peritoneal Dialysis] explode all trees OR MeSH descriptor: [Peritoneal Dialysis, Continuous Ambulatory] explode all trees OR ("kidney transplantation" or "kidneytransplantations" or "kidney transplant" or "kidney transplants" or "renal transplant" or "renal transplants" or "renal transplantation" or "renal transplantations" or "renal graft" or "renal grafts" or "renal grafting" or "kidney graft" or "laparoscopic nephrectomy" or "kidney grafts" or "kidney grafting" or "kidney donation" or "kidney donations" or "kidney donor" or "kidney donors" or "kidney recipient" or "kidney recipients" or ("kidney" and "posttransplant") or ("kidney" and "posttransplanted") or ("kidney" and "posttransplantation") or ("kidney" and "posttransplantations") or ("kidney" and "post-transplantation") or ("kidney" and "post-transplant") or ("kidney" and "post-transplants")) or ("hemodialysis" or "hemodialyses" or "peritoneal dialysis") AND MeSH descriptor: [Activities of Daily Living] explode all trees OR MeSH descriptor: [Quality of Life] explode all trees OR MeSH descriptor: [Employment] explode all trees OR ("ADL" or "IADL" or "activities of daily living" or "daily living activities" or "daily living activity" or "limitation of activity" or "physical function" or "physical functioning" or "physical</p>                                                                                                                                                                                                                                                                                                                                                                                                                                                                                                                                                                         |

|                      |                                                                                                                                                                                                                                                                                                                                                                                                                                                                                                                                                                                                                                                                                                                                                                                                                                                                                                                                                                                                                                                                                                                                                                                                                                                                                                                                                                                                                                                                                                                                                                                                                                                                                                                                                                                                                                                                                                                                                                                  |
|----------------------|----------------------------------------------------------------------------------------------------------------------------------------------------------------------------------------------------------------------------------------------------------------------------------------------------------------------------------------------------------------------------------------------------------------------------------------------------------------------------------------------------------------------------------------------------------------------------------------------------------------------------------------------------------------------------------------------------------------------------------------------------------------------------------------------------------------------------------------------------------------------------------------------------------------------------------------------------------------------------------------------------------------------------------------------------------------------------------------------------------------------------------------------------------------------------------------------------------------------------------------------------------------------------------------------------------------------------------------------------------------------------------------------------------------------------------------------------------------------------------------------------------------------------------------------------------------------------------------------------------------------------------------------------------------------------------------------------------------------------------------------------------------------------------------------------------------------------------------------------------------------------------------------------------------------------------------------------------------------------------|
|                      | <p>activity" or "travel" or "Transportation" or "recreation" or "social participation" or "leisure" or "employment" or "work" or "working capacity" or "job" or "jobs" or "Freedom" or "quality of life" or "SF-36" or "HRQL")</p>                                                                                                                                                                                                                                                                                                                                                                                                                                                                                                                                                                                                                                                                                                                                                                                                                                                                                                                                                                                                                                                                                                                                                                                                                                                                                                                                                                                                                                                                                                                                                                                                                                                                                                                                               |
| <p><b>EMBASE</b></p> | <p>'kidney transplantation'/exp OR 'hemodialysis'/exp OR 'continuous ambulatory peritoneal dialysis'/exp OR 'peritoneal dialysis'/exp OR 'kidney transplantation':ab,ti OR 'kidney transplantations':ab,ti OR 'kidney transplant':ab,ti OR 'kidney transplants':ab,ti OR 'renal transplant':ab,ti OR 'renal transplants':ab,ti OR 'renal transplantation':ab,ti OR 'renal transplantations':ab,ti OR 'renal graft':ab,ti OR 'renal grafts':ab,ti OR 'renal grafting':ab,ti OR 'kidney graft':ab,ti OR 'laparoscopic nephrectomy':ab,ti OR 'kidney grafts':ab,ti OR 'kidney grafting':ab,ti OR 'kidney donation':ab,ti OR 'kidney donations':ab,ti OR 'kidney donor':ab,ti OR 'kidney donors':ab,ti OR 'kidney recipient':ab,ti OR 'kidney recipients':ab,ti OR ('kidney':ab,ti AND 'posttransplant':ab,ti) OR ('kidney':ab,ti AND 'posttransplanted':ab,ti) OR ('kidney':ab,ti AND 'posttransplantation':ab,ti) OR ('kidney':ab,ti AND 'posttransplantations':ab,ti) OR ('kidney':ab,ti AND 'post-transplantation':ab,ti) OR ('kidney':ab,ti AND 'post-transplant':ab,ti) OR ('kidney':ab,ti AND 'post-transplants':ab,ti) OR 'hemodialysis':ab,ti OR 'hemodialyses':ab,ti OR 'peritoneal dialysis':ab,ti AND ('daily life activity'/exp OR 'employment'/exp OR 'quality of life'/exp/mj OR 'adl':ab,ti OR 'iادل':ab,ti OR 'activities of daily living':ab,ti OR 'dailing living activities':ab,ti OR 'daily living activity':ab,ti OR 'limitation of activity':ab,ti OR 'physical function':ab,ti OR 'physical functioning':ab,ti OR 'physical activity':ab,ti OR 'travel':ab,ti OR 'transportation':ab,ti OR 'recreation':ab,ti OR 'social participation':ab,ti OR 'leisure':ab,ti OR 'employment':ab,ti OR 'work':ab,ti OR 'working capacity':ab,ti OR 'job':ab,ti OR 'jobs':ab,ti OR 'freedom':ab,ti OR 'quality of life':ab,ti OR 'sf-36':ab,ti OR 'hrql':ab,ti) AND ([adult]/lim OR [aged]/lim) AND [humans]/lim AND [english]/lim AND [1-1-1980]/sd NOT [1-4-2012]/sd</p> |
