# Supplementary material
Source: PubMed Central journal article supplement (PMC3809150)
Supplement: NIHMS486330-supplement-02.pdf [file NIHMS486330-supplement-02.pdf]

**Table S2.** Additional Study Participant Characteristics

| Author Last Name; Publication Year | Treatment Modality | Sample Size | Mean Treatment Time (SD)              | Primary ESRD Cause (%): Diabetes- DM or Hypertension-HTN | Employed                                                              | Education                                                 | Physical Function | Travel | Recreation | Freedom | Work |
|------------------------------------|--------------------|-------------|---------------------------------------|----------------------------------------------------------|-----------------------------------------------------------------------|-----------------------------------------------------------|-------------------|--------|------------|---------|------|
| Aiyasanon 2009 <sup>1</sup>        | HD                 | 87          | *26.7% on treatment more than 3 years | *26.4% with DM                                           | 53.2% with full time job                                              | 18.6% with at least a Bachelor's degree                   | X                 | X      | X          | X       | X    |
|                                    | PD                 | 23          | *26.1% on treatment more than 3 years | *52.1% with DM                                           | 36.8% with full time job                                              | 28.6% with at least a Bachelor's degree                   |                   |        |            |         |      |
| Alavi 2009 <sup>2</sup>            | HD                 | 63          | 30.3 (36.8) months                    | *54% with DM; 65% with HTN                               | N/R                                                                   | 9.7% diploma or higher                                    | X                 |        |            |         |      |
|                                    | TX                 | 100         | 64.7 (59.5) months                    | *20% with DM; 35% with HTN                               |                                                                       | 31.3% diploma or higher                                   |                   |        |            |         |      |
| Apostolou 2007 <sup>3</sup>        | PD                 | 26          | 24 (19) months                        | *42% with DM                                             | 46% with full time job                                                | N/R                                                       | X                 |        | X          |         |      |
|                                    | TX                 | 20          | N/R                                   | *100% with DM                                            | 50% with full time job                                                | N/R                                                       |                   |        |            |         |      |
| Baiardi 2002 <sup>4</sup>          | HD                 | 171         | 60.3 (66.7) months                    | 5.9% DM, 60.8% HTN                                       | N/R                                                                   | N/R                                                       | X                 |        |            |         |      |
|                                    | PD                 | 30          | 29.6 (30.3) months                    | 6.8% DM, 80% HTN                                         |                                                                       |                                                           |                   |        |            |         |      |
|                                    | TX                 | 34          | 63.0 (46.7) months                    | 3% DM, 79.5% HTN                                         |                                                                       |                                                           |                   |        |            |         |      |
| Barendse 2005 <sup>5</sup>         | HD                 | 35          | 3.3 (3.1) years                       | N/R                                                      | *14.3 days = mean number reported lost work days in the past 2 months | 16.8 (5.4) = mean age (SD) at leaving full-time education |                   |        |            | X       |      |
|                                    | PD                 | 57          |                                       |                                                          |                                                                       |                                                           |                   |        |            |         |      |
|                                    | TX                 | 46          |                                       |                                                          |                                                                       |                                                           |                   |        |            |         |      |
| Basok 2008 <sup>6</sup>            | HD                 | 24          | *At least 6 months on treatment       | N/R                                                      | 8.3%                                                                  | 16.7% high school or university                           | X                 |        | X          |         |      |
|                                    | PD                 | 21          |                                       |                                                          | 14.3%                                                                 | 4.8% high school or university                            |                   |        |            |         |      |
|                                    | TX                 | 20          |                                       |                                                          | 20%                                                                   | 5% high school or university                              |                   |        |            |         |      |
| Borowiak 2009 <sup>7</sup>         | HD                 | 50          | N/R                                   | 24% with DM                                              | N/R                                                                   | 10.2 (3.0) mean years                                     | X                 |        |            | X       |      |
|                                    | PD                 | 50          |                                       | 38% with DM                                              |                                                                       | 10.4 (2.7) mean years                                     |                   |        |            |         |      |
| Bremer 1989 <sup>8</sup>           | HD (in-center)     | 105         | 42.3 (13.4) months                    | 42%                                                      | 32% (aged 18-55 years)                                                | 11.2 (2.5) mean years                                     |                   |        |            | X       |      |
|                                    | HD (self-care)     | 41          | 39.6 (24.0) months                    | 37%                                                      | 6% (aged 18-55 years)                                                 | 12.0 (2.5) mean years                                     |                   |        |            |         |      |
|                                    | HD (home)          | 47          | 72.7 (63.4) months                    | 26%                                                      | 46% (aged 18-55 years)                                                | 12.9 (2.9) mean years                                     |                   |        |            |         |      |
|                                    | PD                 | 79          | 22.7 (14.4) months                    | 44%                                                      | 38% (aged 18-55 years)                                                | 12.3 (2.5) mean years                                     |                   |        |            |         |      |
|                                    | TX (first)         | 166         | 52.0 (39.3) months                    | 16%                                                      | 56% (aged 18-55 years)                                                | 13.0 (2.6) mean years                                     |                   |        |            |         |      |
|                                    | TX (failed)        | 30          | 50.4 (41.9) months                    | 4%                                                       | 23% (aged 18-55 years)                                                | 12.9 (2.7) mean years                                     |                   |        |            |         |      |
|                                    | TX (>1)            | 21          | 35.3 (32.5) months                    | 10%                                                      | 45% (aged 18-55 years)                                                | 13.4 (1.6) mean years                                     |                   |        |            |         |      |
| Carmichael 2000 <sup>9</sup>       | HD                 | 49          | 2.12 (2.2) years                      | 18.4%                                                    | 8.2%                                                                  | 14.3% w/ high education                                   | X                 |        | X          |         |      |
|                                    | PD                 | 97          | 2.2 (2.1) years                       | 17.5%                                                    | 10.3%                                                                 | 6.2% w/ high education                                    |                   |        |            |         |      |
| Curtin 1996 <sup>10</sup>          | HD (in-center)     | 311         | 3.83 (4.21) years                     | 50.4%                                                    | 23.4%                                                                 | 75.2% high school graduate or higher                      |                   |        |            |         | X    |
|                                    | HD (home)          | 3           |                                       |                                                          | 0%                                                                    |                                                           |                   |        |            |         |      |
|                                    | PD                 | 42          |                                       |                                                          | 28.5%                                                                 |                                                           |                   |        |            |         |      |

| Author Last Name; Publication Year | Treatment Modality | Sample Size | Mean Treatment Time (SD) | Primary ESRD Cause (%): Diabetes- DM or Hypertension-HTN | Employed            | Education                                              | Physical Function | Travel | Recreation | Freedom | Work |
|------------------------------------|--------------------|-------------|--------------------------|----------------------------------------------------------|---------------------|--------------------------------------------------------|-------------------|--------|------------|---------|------|
| Devins 1990 <sup>11</sup>          | HD (in-center)     | 39          | N/R                      | N/R                                                      | N/R                 | 57% high school graduate or greater                    |                   |        | X          |         | X    |
|                                    | HD (home)          | 15          |                          |                                                          |                     |                                                        |                   |        |            |         |      |
|                                    | PD                 | 11          |                          |                                                          |                     |                                                        |                   |        |            |         |      |
|                                    | TX                 | 34          |                          |                                                          |                     |                                                        |                   |        |            |         |      |
| Diaz-buxo 2000 <sup>12</sup>       | HD                 | 16,755      | N/R                      | *45.46% with DM                                          | N/R                 | N/R                                                    | X                 |        | X          |         |      |
|                                    | PD                 | 1,260       | N/R                      | *37.98% with DM                                          |                     |                                                        |                   |        |            |         |      |
| Evans 1985 <sup>13</sup>           | HD (in-center)     | 347         | 41.0 months              | 20.8%                                                    | *49.6% able to work | 12.1 mean years                                        |                   |        |            |         | X    |
|                                    | HD (home)          | 287         |                          |                                                          |                     |                                                        |                   |        |            |         |      |
|                                    | PD                 | 81          |                          |                                                          |                     |                                                        |                   |        |            |         |      |
|                                    | TX                 | 44          |                          |                                                          |                     |                                                        |                   |        |            |         |      |
| Fujisawa 2000 <sup>14</sup>        | HD (awaiting TX)   | 49          | 10.0 (6.8) years         | 4%                                                       | N/R                 | N/R                                                    | X                 |        |            |         |      |
|                                    | HD (not awaiting)  | 65          | 7.7 (5.0) years          | 5%                                                       |                     |                                                        |                   |        |            |         |      |
|                                    | TX                 | 117         | 3.1 (3.8) years          | 0%                                                       |                     |                                                        |                   |        |            |         |      |
| Harris 2002 <sup>15</sup>          | HD                 | 96          | 18.2 (21.1) months       | N/R                                                      | N/R                 | N/R                                                    | X                 |        |            |         |      |
|                                    | PD                 | 78          | 18.0 (19.9) months       |                                                          |                     |                                                        |                   |        |            |         |      |
| Hart 1987 <sup>16</sup>            | HD (in-center)     | 347         | 37.7 months              | 10.1%                                                    | N/R                 | 11.5 mean years                                        |                   |        | X          |         | X    |
|                                    | HD (home)          | 287         | 45.7 months              | 8.2%                                                     |                     | 12.8 mean years                                        |                   |        |            |         |      |
|                                    | PD                 | 81          | 11.4 months              | 16.2%                                                    |                     | 11.9 mean years                                        |                   |        |            |         |      |
|                                    | TX                 | 144         | 51.3 months              | 7.9%                                                     |                     | 12.2 mean years                                        |                   |        |            |         |      |
| Holley 1994 <sup>17</sup>          | HD                 | 46          | 24 median months         | *23% reported DM as a comorbid condition                 | 43%                 | 92% completed 12 years or greater                      |                   |        |            |         | X    |
|                                    | PD                 | 31          |                          |                                                          |                     |                                                        |                   |        |            |         |      |
| Ibrahim 2011 <sup>18</sup>         | HD                 | 183         | 36-120 months (36.5%)    | N/R                                                      | 25.5% employed      | N/R                                                    | X                 |        | X          |         |      |
|                                    | PD                 | 91          |                          |                                                          |                     |                                                        |                   |        |            |         |      |
| Jofre 1998 <sup>19</sup>           | Pre-TX (HD)        | 93          | 5.0 (4.7) years          | 2%                                                       | N/R                 | Male: 38% completed secondary education<br>Female: 27% | X                 |        |            |         |      |
|                                    | Post-TX            |             | 17.6 (6.8) months        |                                                          | 35%                 |                                                        |                   |        |            |         |      |
| Johansen 2010 <sup>20</sup>        | HD                 | N/R         | N/R                      | *M-55% with DM<br>*F-58% with DM                         | N/R                 | N/R                                                    | X                 |        |            |         |      |
|                                    | PD                 | 161         |                          |                                                          |                     |                                                        |                   |        |            |         |      |
| Juergensen 2006 <sup>21</sup>      | HD                 | 84          | 32 (20) months           | *47.6% with DM                                           | N/R                 | 80% high school graduate or greater                    |                   |        | X          |         |      |
|                                    | PD                 | 62          | 38 (8) months            | *51.6% with DM                                           |                     | 82% high school graduate or greater                    |                   |        |            |         |      |

| Author Last Name; Publication Year | Treatment Modality | Sample Size | Mean Treatment Time (SD) | Primary ESRD Cause (%): Diabetes- DM or Hypertension-HTN | Employed                          | Education                             | Physical Function | Travel | Recreation | Freedom | Work |
|------------------------------------|--------------------|-------------|--------------------------|----------------------------------------------------------|-----------------------------------|---------------------------------------|-------------------|--------|------------|---------|------|
| Julius 1989 <sup>22</sup>          | HD                 | 95          | N/R                      | 42.1%                                                    | 9.6%                              | 52.5% completed 12 years or greater   |                   |        |            |         | X    |
|                                    | PD                 | 119         |                          | 21.0%                                                    | 22.7%                             | 70.6% completed 12 years or greater   |                   |        |            |         |      |
| Khan 1995 <sup>23</sup>            | HD                 | 43          | 22.2 median months       | N/R                                                      | N/R                               | N/R                                   | X                 |        |            |         |      |
|                                    | PD                 | 27          | 31.6 median months       |                                                          |                                   |                                       |                   |        |            |         |      |
|                                    | TX                 | 102         | 130 median months        |                                                          |                                   |                                       |                   |        |            |         |      |
| Koch 1990 <sup>24</sup>            | HD                 | 290         | N/R                      | N/R                                                      | N/R                               | N/R                                   | X                 |        |            |         |      |
|                                    | PD                 | 68          |                          | N/R                                                      | 38%                               |                                       |                   |        |            |         |      |
|                                    | TX                 | 761         |                          | 2 years                                                  |                                   |                                       |                   |        |            |         |      |
| Kontodimoloulos 2009 <sup>25</sup> | HD                 | 642         | 6.2 (5.7) years on HD    | 31%                                                      | 38.6% employed                    | 14.8% university                      | X                 |        | X          |         |      |
|                                    | PD                 | 65          | 5.3 (5.6) years on HD    | 15.6%                                                    | 49.2% employed                    | 13.4% university                      |                   |        |            |         |      |
|                                    | TX                 | 167         | 4.1 (3.2) years on HD    | 14.6%                                                    | 66.4% employed                    | 31.5% university                      |                   |        |            |         |      |
| Kutner 2005 <sup>26</sup>          | HD                 | 455         | 2.2 (0.9) months         | 44.4%                                                    | 7.7%                              | 59.8% high school graduate or greater | X                 |        |            |         |      |
|                                    | PD                 | 413         | 2.2 (0.8) months         | 44.3%                                                    | 21.8%                             | 77.2% high school graduate or greater |                   |        |            |         |      |
| Lee 2005 <sup>27</sup>             | HD (male)          | 99          | N/R                      | N/R                                                      | N/R                               | N/R                                   | X                 |        | X          | X       | X    |
|                                    | HD (female)        |             |                          |                                                          |                                   |                                       |                   |        |            |         |      |
|                                    | PD (male)          | 74          |                          |                                                          |                                   |                                       |                   |        |            |         |      |
|                                    | PD (female)        |             |                          |                                                          |                                   |                                       |                   |        |            |         |      |
|                                    | TX (male)          | 209         |                          |                                                          |                                   |                                       |                   |        |            |         |      |
|                                    | TX (female)        |             |                          |                                                          |                                   |                                       |                   |        |            |         |      |
| Lok 1996 <sup>28</sup>             | HD                 | 56          | 3-4 years                | N/R                                                      | 56%                               | N/R                                   | X                 |        |            |         |      |
|                                    | PD                 | 8           |                          |                                                          |                                   |                                       |                   |        |            |         |      |
| Manns 2003 <sup>29</sup>           | HD                 | 151         | 22 months                | 35.7%                                                    | 29.1% working among those age <65 | 78.4% completed grade 12 or greater   | X                 |        | X          |         |      |
|                                    | PD                 | 41          | 23 months                | 48.8%                                                    | 43.4% working among those age <65 | 71% completed grade 12 or greater     |                   |        |            |         |      |
| Masuda 2009 <sup>30</sup>          | HD                 | 35          | 6.2 (6.1) median yrs     | 17.1%-DM                                                 | N/R                               | N/R                                   | X                 |        |            |         |      |
|                                    | PD                 | 26          | 3.3 (2.4) median yrs     | 30.8%-DM                                                 |                                   |                                       |                   |        |            |         |      |
| Merkus 1997 <sup>31</sup>          | HD                 | 120         | N/R                      | 13%-DM                                                   | 16% employed                      | 36% high secondary school or greater  | X                 |        | X          |         |      |

| Author Last Name; Publication Year | Treatment Modality | Sample Size | Mean Treatment Time (SD) | Primary ESRD Cause (%): Diabetes- DM or Hypertension-HTN | Employed                              | Education                             | Physical Function | Travel | Recreation | Freedom | Work |
|------------------------------------|--------------------|-------------|--------------------------|----------------------------------------------------------|---------------------------------------|---------------------------------------|-------------------|--------|------------|---------|------|
|                                    | PD                 | 106         |                          | 15%-DM                                                   | 38% employed                          | 48% high secondary school or greater  |                   |        |            |         |      |
| Merkus 1999 <sup>32</sup>          | HD                 | 120         | 3 months                 | 38%                                                      | 16%                                   | N/R                                   | X                 |        | X          |         |      |
|                                    | PD                 | 106         |                          | 38%                                                      | 38%                                   |                                       |                   |        |            |         |      |
| Molsted 2007 <sup>33</sup>         | HD                 | 71          | 39 (59) months           | 19%                                                      | N/R                                   | N/R                                   |                   |        |            |         | X    |
|                                    | PD                 | 59          | 27 (26) months           | 37%                                                      |                                       |                                       |                   |        |            |         |      |
| Niu 2005 <sup>34</sup>             | HD                 | 80          | 59.0 months              | N/R                                                      | 46.3%                                 | 55.4% high school graduate or greater | X                 |        |            |         |      |
|                                    | PD                 | 80          | 30.9 months              |                                                          |                                       |                                       |                   |        |            |         |      |
|                                    | TX                 | 80          | 75.0 months              |                                                          |                                       |                                       |                   |        |            |         |      |
| Ogutmen 2006 <sup>35</sup>         | HD                 | 64          | N/R                      | N/R                                                      | 97%                                   | 22% college graduate or greater       | X                 |        | X          |         |      |
|                                    | PD                 | 207         |                          |                                                          |                                       |                                       |                   |        |            |         |      |
|                                    | TX                 | 302         |                          |                                                          |                                       |                                       |                   |        |            |         |      |
| Panagopoulou 2009 <sup>36</sup>    | HD                 | 40          | > 6 months               | N/R                                                      | 20% working full or part              | 23% university                        |                   |        |            |         | X    |
|                                    | PD                 | 36          | > 6 months               |                                                          | 30% working full or part              | 17% university                        |                   |        |            |         |      |
|                                    | TX                 | 48          | > 6 months               |                                                          | 56% working full or part              | 19% university                        |                   |        |            |         |      |
| Pietrabissa 1992 <sup>37</sup>     | HD                 | 172         | N/R                      | N/R                                                      | N/R                                   | N/R                                   | X                 |        |            |         |      |
|                                    | TX                 | 71          |                          |                                                          |                                       |                                       |                   |        |            |         |      |
| Sayin 2007 <sup>38</sup>           | HD                 | 75          | 46.04 (42.28) months     | 13.3%-DM                                                 | 39.7% working                         | 39.2% >8 years                        | X                 |        | X          |         |      |
|                                    | PD                 | 41          | 34.47 (27.28) months     | 19.5%-DM                                                 | 26.8% working                         | 39.0% >8 years                        |                   |        |            |         |      |
|                                    | TX                 | 20          | 41.10 (39.99) months     | 0%-DM                                                    | 35.0% working                         | 40.0% >8 years                        |                   |        |            |         |      |
| Simmons 1990 <sup>39</sup>         | HD                 | 83          | at least 1 year          | *Diabetic patients excluded                              | N/R                                   | N/R                                   | X                 |        | X          | X       | X    |
|                                    | PD                 | 510         | at least 1               |                                                          |                                       |                                       |                   |        |            |         |      |
|                                    | TX (current)       | 91          | 1-4 years                |                                                          |                                       |                                       |                   |        |            |         |      |
|                                    | TX (historical)    | 82          | 5-9 years                |                                                          |                                       |                                       |                   |        |            |         |      |
| Tell 1995 <sup>40</sup>            | HD (in-center)     | 186         | 3.2 years                | N/R                                                      | 11%                                   | 87.1% high school graduate or greater | X                 |        |            |         |      |
|                                    | HD (home)          | 12          |                          |                                                          |                                       |                                       |                   |        |            |         |      |
|                                    | PD                 | 58          |                          |                                                          |                                       |                                       |                   |        |            |         |      |
| Thong 2009 <sup>41</sup>           | HD                 | 1010        | 3 months                 | 14.1%                                                    | N/R                                   | 57.2% low education                   | X                 |        |            |         |      |
|                                    | PD                 | 543         | 3 months                 | 15.1%                                                    |                                       | 45.1% low education                   |                   |        |            |         |      |
| Tomasz 2003 <sup>42</sup>          | HD                 | 61          | 40.63 (45.74) months     | N/R                                                      | 9.8%                                  | 57% with upper degree                 | X                 |        | X          |         | X    |
|                                    | TX                 | 83          | 35.0 (24.0) months       | N/R                                                      | 16.9%                                 | 65% with upper degree                 |                   |        |            |         |      |
| Tucker 1991 <sup>43</sup>          | HD                 | 22          | 53.4 (46.6) months       | 17%                                                      | 12.5 (13.5) mean weekly working hours | 10.2 (4.0) mean years                 |                   |        | X          |         |      |
|                                    | PD                 | 29          | 33.7 (22.2) months       | 27%                                                      | 12.5 (13.5) mean weekly working hours | 11.5 (2.2) mean years                 |                   |        |            |         |      |

| Author Last Name; Publication Year | Treatment Modality | Sample Size | Mean Treatment Time (SD) | Primary ESRD Cause (%): Diabetes- DM or Hypertension-HTN | Employed | Education                           | Physical Function | Travel | Recreation | Freedom | Work |
|------------------------------------|--------------------|-------------|--------------------------|----------------------------------------------------------|----------|-------------------------------------|-------------------|--------|------------|---------|------|
| Van de Ham 2005 <sup>44</sup>      | HD                 | 16          | 24.8 (18.3) months       | *Diabetic patients excluded                              | N/R      | N/R                                 | X                 |        |            |         |      |
|                                    | TX                 | 35          | 84.3 (80.4)              |                                                          |          |                                     |                   |        |            |         |      |
| Wolcott 1988 <sup>45</sup>         | HD                 | 33          | 60.6 months              | *All patients were non-diabetic                          | 9%       | 12.8 (3.2) mean years               | X                 |        |            |         |      |
|                                    | PD                 | 33          | 56.3 months              |                                                          | 30%      | 14.2 (3.4) mean years               |                   |        |            |         |      |
| Wu 2004 <sup>46</sup>              | HD                 | 698         | 45 median days           | 47%                                                      | 9%       | 67% high school graduate or greater | X                 | X      | X          | X       | X    |
|                                    | PD                 | 230         |                          |                                                          | 26%      | 82% high school graduate or greater |                   |        |            |         |      |

Table S3 Notes: HD = hemodialysis PD = peritoneal dialysis TX = transplant M=Male  
F=Female

HTN = hypertension SD = standard deviation N/R = not reported

\* = related information provided within the article

\*\* denotes studies were originally designed as longitudinal cohort but only reported cross-sectional assessments of relevant outcomes

## References

1. Aiyasanon N, Premasathian N, Nimmannit A, Jetanavanich P, Sritippayawan S. Validity and reliability of CHOICE Health Experience Questionnaire: Thai version. *J Med Assoc Thai*. Sep 2009;92(9):1159-1166.
2. Alavi NM, Aliakbarzadeh Z, Sharifi K. Depression, anxiety, activities of daily living, and quality of life scores in patients undergoing renal replacement therapies. *Transplant Proc*. Nov 2009;41(9):3693-3696.
3. Apostolou T, Hutchison AJ, Boulton AJM, et al. Quality of life in CAPD, transplant, and chronic renal failure patients with diabetes. *Renal Failure*. 2007;29(2):189-197.
4. Baiardi F, Esposti ED, Cocchi R, et al. Effects of clinical and individual variables on quality of life in chronic renal failure patients. *Journal of Nephrology*. 2002;15(1):61-67.
5. Barendse SM, Speight J, Bradley C. The Renal Treatment Satisfaction Questionnaire (RTSQ): a measure of satisfaction with treatment for chronic kidney failure. *Am J Kidney Dis*. Mar 2005;45(3):572-579.
6. Basok EK, Atsu N, Rifaioglu MM, Kantarci G, Yildirim A, Tokuc R. Assessment of female sexual function and quality of life in predialysis, peritoneal dialysis, hemodialysis, and renal transplant patients. *Int Urol Nephrol*. 2009;41(3):473-481.

7. Borowiak E, Braksator E, Nowicki M, Kostka T. Quality of life of chronic hemodialysis and peritoneal dialysis patients. *Clinical and Experimental Medical Letters*. 2009;50(1):37-42.
8. Bremer BA, McCauley CR, Wrona RM, Johnson JP. Quality of life in end-stage renal disease: a reexamination. *Am J Kidney Dis*. Mar 1989;13(3):200-209.
9. Carmichael P, Popoola J, John I, Stevens PE, Carmichael AR. Assessment of quality of life in a single centre dialysis population using the KDQOL-SF questionnaire. *Qual Life Res*. Mar 2000;9(2):195-205.
10. Curtin RB, Oberley ET, Sacksteder P, Friedman A. Differences between employed and nonemployed dialysis patients. *American Journal of Kidney Diseases*. 1996;27(4):533-540.
11. Devins GM, Mandin H, Hons RB, et al. Illness intrusiveness and quality of life in end-stage renal disease: comparison and stability across treatment modalities. *Health Psychol*. 1990;9(2):117-142.
12. Diaz-Buxo JA, Lowrie EG, Lew NL, Zhang H, Lazarus JM. Quality-of-life evaluation using Short Form 36: comparison in hemodialysis and peritoneal dialysis patients. *Am J Kidney Dis*. 2000 Feb;35(2):293-300.
13. Evans RW, Manninen DL, Garrison LP, Jr., et al. The quality of life of patients with end-stage renal disease. *N Engl J Med*. Feb 28 1985;312(9):553-559.
14. Fujisawa M, Ichikawa Y, Yoshiya K, et al. Assessment of health-related quality of life in renal transplant and hemodialysis patients using the SF-36 health survey. *Urology*. Aug 1 2000;56(2):201-206.
15. Harris SAC, Lamping DL, Brown EA, et al. Clinical outcomes and quality of life in elderly patients on peritoneal dialysis versus hemodialysis. *Peritoneal Dialysis International*. 2002;22(4):463-470.
16. Hart LG, Evans RW. The functional status of ESRD patients as measured by the Sickness Impact Profile. *J Chronic Dis*. 1987;40 Suppl 1:117S-136S.
17. Holley JL, Nespor S. An analysis of factors affecting employment of chronic dialysis patients. *Am J Kidney Dis*. May 1994;23(5):681-685.
18. Ibrahim N, Chiew-Tong NK, Desa A. Symptoms and health-related quality of life in patients with hemodialysis and continuous ambulatory peritoneal dialysis. *Research Journal of Medical Sciences*. 2011;5(5):252-256.
19. Jofre R, Lopez-Gomez JM, Moreno F, Sanz-Guajardo D, Valderrabano F. Changes in quality of life after renal transplantation. *Am J Kidney Dis*. Jul 1998;32(1):93-100.
20. Johansen KL, Chertow GM, Kutner NG, Dalrymple LS, Grimes BA, Kaysen GA. Low level of self-reported physical activity in ambulatory patients new to dialysis. *Kidney Int*. Dec 2010;78(11):1164-1170.
21. Juergensen E, Wuerth D, Finkelstein SH, Juergensen PH, Bekui A, Finkelstein FO. Hemodialysis and peritoneal dialysis: patients' assessment of their satisfaction with therapy and the impact of the therapy on their lives. *Clin J Am Soc Nephrol*. Nov 2006;1(6):1191-1196.
22. Julius M, Kneisley JD, Carpentier-Alting P, Hawthorne VM, Wolfe RA, Port FK. A comparison of employment rates of patients

- treated with continuous ambulatory peritoneal dialysis vs in-center hemodialysis (Michigan End-Stage Renal Disease Study). *Arch Intern Med*. Apr 1989;149(4):839-842.
23. Khan IH, Garratt AM, Kumar A, et al. Patients' perception of health on renal replacement therapy: Evaluation using a new instrument. *Nephrology Dialysis Transplantation*. 1995;10(5):684-689.
  24. Koch U, Muthny FA. Quality of life in patients with end-stage renal disease in relation to the method of treatment. *Psychother Psychosom*. 1990;54(2-3):161-171.
  25. Kontodimopoulos N, Pappa E, Niakas D. Gender- and age-related benefit of renal replacement therapy on health-related quality of life. *Scand J Caring Sci*. Dec 2009;23(4):721-729.
  26. Kutner NG, Zhang R, Barnhart H, Collins AJ. Health status and quality of life reported by incident patients after 1 year on haemodialysis or peritoneal dialysis. *Nephrol Dial Transplant*. Oct 2005;20(10):2159-2167.
  27. Lee AJ, Morgan CL, Conway P, Currie CJ. Characterisation and comparison of health-related quality of life for patients with renal failure. *Curr Med Res Opin*. Nov 2005;21(11):1777-1783.
  28. Lok P. Stressors, coping mechanisms and quality of life among dialysis patients in Australia. *J Adv Nurs*. May 1996;23(5):873-881.
  29. Manns B, Johnson JA, Taub K, Mortis G, Ghali WA, Donaldson C. Quality of life in patients treated with hemodialysis or peritoneal dialysis: what are the important determinants? *Clin Nephrol*. Nov 2003;60(5):341-351.
  30. Masuda R, Imamura H, Mizuuchi K, Miyahara K, Kumagai H, Hirakata H. Physical activity, high-density lipoprotein cholesterol subfractions and lecithin:cholesterol acyltransferase in dialysis patients. *Nephron. Clinical practice*. 2009(4):c253-259. <http://onlinelibrary.wiley.com/o/cochrane/clcentral/articles/876/CN-00704876/frame.html>.
  31. Merkus MP, Jager KJ, Dekker FW, et al. Quality of life in patients on chronic dialysis: Self-assessment 3 months after the start of treatment. *American Journal of Kidney Diseases*. 1997;29(4):584-592.
  32. Merkus MP, Jager KJ, Dekker FW, de Haan RJ, Boeschoten EW, Krediet RT. Physical symptoms and quality of life in patients on chronic dialysis: results of The Netherlands Cooperative Study on Adequacy of Dialysis (NECOSAD). *Nephrol Dial Transplant*. May 1999;14(5):1163-1170.
  33. Molsted S, Prescott L, Heaf J, Eidemak I. Assessment and clinical aspects of health-related quality of life in dialysis patients and patients with chronic kidney disease. *Nephron Clin Pract*. 2007;106(1):c24-33.
  34. Niu SF, Li IC. Quality of life of patients having renal replacement therapy. *J Adv Nurs*. Jul 2005;51(1):15-21.
  35. Ogutmen B, Yildirim A, Sever MS, et al. Health-related quality of life after kidney transplantation in comparison intermittent hemodialysis, peritoneal dialysis, and normal controls. *Transplant Proc*. Mar 2006;38(2):419-421.
  36. Panagopoulou A, Hardalias A, Berati S, Fourtounas C. Psychosocial issues and quality of life in patients on renal replacement therapy. *Saudi J Kidney Dis Transpl*. Mar 2009;20(2):212-218.
  37. Pietrabissa A, Ciaramella A, Carmellini M, et al. Effect of kidney transplantation on quality of life measures. *Transpl Int*. 1992;5

Suppl 1:S708-710.

38. Sayin A, Mutluay R, Sindel S. Quality of Life in Hemodialysis, Peritoneal Dialysis, and Transplantation Patients. *Transplantation Proceedings*. 2007;39(10):3047-3053.
39. Simmons RG, Anderson CR, Abress LK. Quality of life and rehabilitation differences among four end-stage renal disease therapy groups. *Scand J Urol Nephrol Suppl*. 1990;131:7-22.
40. Tell GS, Mittelmark MB, Hylander B, Shumaker SA, Russell G, Burkart JM. Social support and health-related quality of life in black and white dialysis patients. *ANNA J*. Jun 1995;22(3):301-308; discussion 309-310.
41. Thong MS, van Dijk S, Noordzij M, et al. Symptom clusters in incident dialysis patients: associations with clinical variables and quality of life. *Nephrol Dial Transplant*. Jan 2009;24(1):225-230.
42. Tomasz W, Piotr S. A trial of objective comparison of quality of life between chronic renal failure patients treated with hemodialysis and renal transplantation. *Ann Transplant*. 2003;8(2):47-53.
43. Tucker CM, Ziller RC, Smith WR, Mars DR, Coons MP. Quality of life of patients on in-center hemodialysis versus continuous ambulatory peritoneal dialysis. *Perit Dial Int*. 1991;11(4):341-346.
44. Van Den Ham ECH, Kooman JP, Schols AMWJ, et al. Similarities in skeletal muscle strength and exercise capacity between renal transplant and hemodialysis patients. *American Journal of Transplantation*. 2005;5(8):1957-1965.
45. Wolcott DL, Nissenson AR. Quality of life in chronic dialysis patients: a critical comparison of continuous ambulatory peritoneal dialysis (CAPD) and hemodialysis. *Am J Kidney Dis*. May 1988;11(5):402-412.
46. Wu AW, Fink NE, Marsh-Manzi JVR, et al. Changes in Quality of Life during Hemodialysis and Peritoneal Dialysis Treatment: Generic and Disease Specific Measures. *Journal of the American Society of Nephrology*. 2004;15(3):743-753.
