# Supplementary material
Source: PubMed Central journal article supplement (PMC3809150)
Supplement: NIHMS486330-supplement-03.pdf [file NIHMS486330-supplement-03.pdf]

**Table S3.** Assessment of Individual Study Quality for Relevant Outcomes of Interest

| #  | Author Year     | Inclusion and Exclusion Criteria Well-Described | Response Rate Greater Than 60% | Minimal Risk of Potential Selection Bias | Valid Assessment of Relevant Outcomes | Appropriate Adjustment for Confounding | Domains Addressed |        |            |         |      |
|----|-----------------|-------------------------------------------------|--------------------------------|------------------------------------------|---------------------------------------|----------------------------------------|-------------------|--------|------------|---------|------|
|    |                 |                                                 |                                |                                          |                                       |                                        | Physical Function | Travel | Recreation | Freedom | Work |
| 1  | Aiyassanon 2009 | X                                               |                                | X                                        | X                                     |                                        | X                 | X      | X          | X       | X    |
| 2  | Alavi 2009      | X                                               |                                |                                          | X                                     | X                                      | X                 |        |            |         |      |
| 3  | Apostolou 2007  | X                                               |                                | X                                        | X                                     | X                                      | X                 |        | X          |         |      |
| 4  | Baiardi 2002    | X                                               | X                              |                                          | X                                     | X                                      | X                 |        |            |         |      |
| 5  | Barendse 2005   | X                                               | X                              |                                          | X                                     |                                        |                   |        |            | X       |      |
| 6  | Basok 2009      | X                                               |                                |                                          | X                                     |                                        | X                 |        | X          |         |      |
| 7  | Borowiak 2009   | X                                               |                                |                                          | X                                     |                                        | X                 |        |            | X       |      |
| 8  | Bremer 1989     | X                                               |                                | X                                        | X                                     |                                        |                   |        |            | X       |      |
| 9  | Carmichael 2000 | X                                               | X                              | X                                        | X                                     |                                        | X                 |        | X          |         |      |
| 10 | Curtin 1996     | X                                               | X                              |                                          | X                                     | X                                      |                   |        |            |         | X    |
| 11 | Devins 1990     |                                                 | X                              |                                          | X                                     |                                        |                   |        | X          |         | X    |
| 12 | Diaz-Buxo 2000  | X                                               |                                |                                          | X                                     | X                                      | X                 |        | X          |         |      |
| 13 | Evans 1985      | X                                               | X                              |                                          | X                                     | X                                      |                   |        |            |         | X    |
| 14 | Fujisawa 2000   |                                                 |                                |                                          | X                                     |                                        | X                 |        |            |         |      |
| 15 | Harris 2002     | X                                               | X                              |                                          | X                                     | X                                      | X                 |        |            |         |      |
| 16 | Hart 1987       |                                                 | X                              |                                          | X                                     |                                        |                   |        | X          |         | X    |
| 17 | Holley 1994     |                                                 |                                |                                          | X                                     |                                        |                   |        |            |         | X    |

|    |                         |   |   |   |   |   |  |   |         |
|----|-------------------------|---|---|---|---|---|--|---|---------|
| 18 | Ibrahim<br>2011         |   |   |   | X |   |  | X | X       |
| 19 | Jofre<br>1998           | X | X |   | X | X |  | X |         |
| 20 | Johansen<br>2010        | X | X |   | X | X |  | X |         |
| 21 | Juergensen<br>2006      | X | X |   |   |   |  |   | X       |
| 22 | Julius<br>1989          | X | X |   | X |   |  |   | X       |
| 23 | Khan<br>1995            |   | X |   | X |   |  | X |         |
| 24 | Koch<br>1990            |   |   |   |   |   |  | X |         |
| 25 | Kontodimoloulos<br>2009 | X | X |   | X |   |  | X | X       |
| 26 | Kutner<br>2005          | X |   | X | X | X |  | X |         |
| 27 | Lee<br>2005             |   |   |   | X |   |  | X | X X X X |
| 28 | Lok<br>1996             |   |   |   | X |   |  | X |         |
| 29 | Masuda<br>2009          |   |   |   | X | X |  | X |         |
| 30 | Manns<br>2003           | X | X |   | X |   |  | X | X       |
| 31 | Merkus<br>1997          | X | X | X | X | X |  | X | X       |
| 32 | Merkus<br>1999          | X | X |   | X |   |  | X | X       |
| 33 | Molsted<br>2007         | X | X |   | X | X |  |   | X       |
| 34 | Niu<br>2005             | X |   |   | X |   |  | X |         |
| 35 | Ogutmen<br>2006         |   | X |   | X |   |  | X | X       |
| 36 | Panagopoulou<br>2009    |   |   |   | X |   |  | X | X       |
| 37 | Pietrabissa<br>1992     | X | X |   | X |   |  | X |         |
| 38 | Sayin<br>2007           | X | X |   | X | X |  | X | X       |

|    |                    |   |   |   |   |  |   |   |   |   |   |
|----|--------------------|---|---|---|---|--|---|---|---|---|---|
| 39 | Simmons<br>1990    | X | X |   | X |  |   | X | X | X | X |
| 40 | Tell<br>1995       | X | X |   | X |  |   | X |   |   |   |
| 41 | Thong<br>2009      | X | X |   | X |  |   | X |   |   |   |
| 42 | Tomasz<br>2003     | X |   |   | X |  |   | X | X |   | X |
| 43 | Tucker<br>1991     | X | X |   | X |  |   |   | X |   |   |
| 44 | Van de Ham<br>2005 |   |   |   | X |  |   | X |   |   |   |
| 45 | Wolcott<br>1988    | X | X |   | X |  | X | X |   |   |   |
| 46 | Wu<br>2004         | X | X | X | X |  | X | X | X | X | X |

### References

1. Aiyasanon N, Premasathian N, Nimmannit A, Jetanavanich P, Sritippayawan S. Validity and reliability of CHOICE Health Experience Questionnaire: Thai version. *J Med Assoc Thai*. Sep 2009;92(9):1159-1166.
2. Alavi NM, Aliakbarzadeh Z, Sharifi K. Depression, anxiety, activities of daily living, and quality of life scores in patients undergoing renal replacement therapies. *Transplant Proc*. Nov 2009;41(9):3693-3696.
3. Apostolou T, Hutchison AJ, Boulton AJM, et al. Quality of life in CAPD, transplant, and chronic renal failure patients with diabetes. *Renal Failure*. 2007;29(2):189-197.
4. Baiardi F, Esposti ED, Cocchi R, et al. Effects of clinical and individual variables on quality of life in chronic renal failure patients. *Journal of Nephrology*. 2002;15(1):61-67.
5. Barendse SM, Speight J, Bradley C. The Renal Treatment Satisfaction Questionnaire (RTSQ): a measure of satisfaction with treatment for chronic kidney failure. *Am J Kidney Dis*. Mar 2005;45(3):572-579.
6. Basok EK, Atsu N, Rifaioğlu MM, Kantarci G, Yildirim A, Tokuc R. Assessment of female sexual function and quality of life in predialysis, peritoneal dialysis, hemodialysis, and renal transplant patients. *Int Urol Nephrol*. 2009;41(3):473-481.
7. Borowiak E, Braksator E, Nowicki M, Kostka T. Quality of life of chronic hemodialysis and peritoneal dialysis patients. *Clinical and Experimental Medical Letters*. 2009;50(1):37-42.
8. Bremer BA, McCauley CR, Wrona RM, Johnson JP. Quality of life in end-stage renal disease: a reexamination. *Am J Kidney Dis*. Mar 1989;13(3):200-209.
9. Carmichael P, Popoola J, John I, Stevens PE, Carmichael AR. Assessment of quality of life in a single centre dialysis population using the KDQOL-SF questionnaire. *Qual Life Res*. Mar 2000;9(2):195-205.
10. Curtin RB, Oberley ET, Sacksteder P, Friedman A. Differences between employed and nonemployed dialysis patients. *American Journal of Kidney*

*Diseases*. 1996;27(4):533-540.

11. Devins GM, Mandin H, Hons RB, et al. Illness intrusiveness and quality of life in end-stage renal disease: comparison and stability across treatment modalities. *Health Psychol*. 1990;9(2):117-142.
12. Diaz-Buxo JA, Lowrie EG, Lew NL, Zhang H, Lazarus JM. Quality-of-life evaluation using Short Form 36: comparison in hemodialysis and peritoneal dialysis patients. *Am J Kidney Dis*. 2000 Feb;35(2):293-300.
13. Evans RW, Manninen DL, Garrison LP, Jr., et al. The quality of life of patients with end-stage renal disease. *N Engl J Med*. Feb 28 1985;312(9):553-559.
14. Fujisawa M, Ichikawa Y, Yoshiya K, et al. Assessment of health-related quality of life in renal transplant and hemodialysis patients using the SF-36 health survey. *Urology*. Aug 1 2000;56(2):201-206.
15. Harris SAC, Lamping DL, Brown EA, et al. Clinical outcomes and quality of life in elderly patients on peritoneal dialysis versus hemodialysis. *Peritoneal Dialysis International*. 2002;22(4):463-470.
16. Hart LG, Evans RW. The functional status of ESRD patients as measured by the Sickness Impact Profile. *J Chronic Dis*. 1987;40 Suppl 1:117S-136S.
17. Holley JL, Nespore S. An analysis of factors affecting employment of chronic dialysis patients. *Am J Kidney Dis*. May 1994;23(5):681-685.
18. Ibrahim N, Chiew-Tong NK, Desa A. Symptoms and health-related quality of life in patients with hemodialysis and continuous ambulatory peritoneal dialysis. *Research Journal of Medical Sciences*. 2011;5(5):252-256.
19. Jofre R, Lopez-Gomez JM, Moreno F, Sanz-Guajardo D, Valderrabano F. Changes in quality of life after renal transplantation. *Am J Kidney Dis*. Jul 1998;32(1):93-100.
20. Johansen KL, Chertow GM, Kutner NG, Dalrymple LS, Grimes BA, Kaysen GA. Low level of self-reported physical activity in ambulatory patients new to dialysis. *Kidney Int*. Dec 2010;78(11):1164-1170.
21. Juergensen E, Wuerth D, Finkelstein SH, Juergensen PH, Bekui A, Finkelstein FO. Hemodialysis and peritoneal dialysis: patients' assessment of their satisfaction with therapy and the impact of the therapy on their lives. *Clin J Am Soc Nephrol*. Nov 2006;1(6):1191-1196.
22. Julius M, Kneisley JD, Carpentier-Alting P, Hawthorne VM, Wolfe RA, Port FK. A comparison of employment rates of patients treated with continuous ambulatory peritoneal dialysis vs in-center hemodialysis (Michigan End-Stage Renal Disease Study). *Arch Intern Med*. Apr 1989;149(4):839-842.
23. Khan IH, Garratt AM, Kumar A, et al. Patients' perception of health on renal replacement therapy: Evaluation using a new instrument. *Nephrology Dialysis Transplantation*. 1995;10(5):684-689.
24. Koch U, Muthny FA. Quality of life in patients with end-stage renal disease in relation to the method of treatment. *Psychother Psychosom*. 1990;54(2-3):161-171.
25. Kontodimopoulos N, Pappa E, Niakas D. Gender- and age-related benefit of renal replacement therapy on health-related quality of life. *Scand J Caring Sci*. Dec 2009;23(4):721-729.
26. Kutner NG, Zhang R, Barnhart H, Collins AJ. Health status and quality of life reported by incident patients after 1 year on haemodialysis or peritoneal dialysis. *Nephrol Dial Transplant*. Oct 2005;20(10):2159-2167.
27. Lee AJ, Morgan CL, Conway P, Currie CJ. Characterisation and comparison of health-related quality of life for patients with renal failure. *Curr Med Res Opin*. Nov 2005;21(11):1777-1783.
28. Lok P. Stressors, coping mechanisms and quality of life among dialysis patients in Australia. *J Adv Nurs*. May 1996;23(5):873-881.
29. Manns B, Johnson JA, Taub K, Mortis G, Ghali WA, Donaldson C. Quality of life in patients treated with hemodialysis or peritoneal dialysis: what are

the important determinants? *Clin Nephrol*. Nov 2003;60(5):341-351.

30. Masuda R, Imamura H, Mizuuchi K, Miyahara K, Kumagai H, Hirakata H. Physical activity, high-density lipoprotein cholesterol subfractions and lecithin:cholesterol acyltransferase in dialysis patients. *Nephron. Clinical practice*. 2009(4):c253-259.  
<http://onlinelibrary.wiley.com/o/cochrane/clcentral/articles/876/CN-00704876/frame.html>.
31. Merkus MP, Jager KJ, Dekker FW, et al. Quality of life in patients on chronic dialysis: Self-assessment 3 months after the start of treatment. *American Journal of Kidney Diseases*. 1997;29(4):584-592.
32. Merkus MP, Jager KJ, Dekker FW, de Haan RJ, Boeschoten EW, Krediet RT. Physical symptoms and quality of life in patients on chronic dialysis: results of The Netherlands Cooperative Study on Adequacy of Dialysis (NECOSAD). *Nephrol Dial Transplant*. May 1999;14(5):1163-1170.
33. Molsted S, Prescott L, Heaf J, Eidemak I. Assessment and clinical aspects of health-related quality of life in dialysis patients and patients with chronic kidney disease. *Nephron Clin Pract*. 2007;106(1):c24-33.
34. Niu SF, Li IC. Quality of life of patients having renal replacement therapy. *J Adv Nurs*. Jul 2005;51(1):15-21.
35. Ogutmen B, Yildirim A, Sever MS, et al. Health-related quality of life after kidney transplantation in comparison intermittent hemodialysis, peritoneal dialysis, and normal controls. *Transplant Proc*. Mar 2006;38(2):419-421.
36. Panagopoulou A, Hardalias A, Berati S, Fourtounas C. Psychosocial issues and quality of life in patients on renal replacement therapy. *Saudi J Kidney Dis Transpl*. Mar 2009;20(2):212-218.
37. Pietrabissa A, Ciaramella A, Carmellini M, et al. Effect of kidney transplantation on quality of life measures. *Transpl Int*. 1992;5 Suppl 1:S708-710.
38. Sayin A, Mutluay R, Sindel S. Quality of Life in Hemodialysis, Peritoneal Dialysis, and Transplantation Patients. *Transplantation Proceedings*. 2007;39(10):3047-3053.
39. Simmons RG, Anderson CR, Abress LK. Quality of life and rehabilitation differences among four end-stage renal disease therapy groups. *Scand J Urol Nephrol Suppl*. 1990;131:7-22.
40. Tell GS, Mittelmark MB, Hylander B, Shumaker SA, Russell G, Burkart JM. Social support and health-related quality of life in black and white dialysis patients. *ANNA J*. Jun 1995;22(3):301-308; discussion 309-310.
41. Thong MS, van Dijk S, Noordzij M, et al. Symptom clusters in incident dialysis patients: associations with clinical variables and quality of life. *Nephrol Dial Transplant*. Jan 2009;24(1):225-230.
42. Tomasz W, Piotr S. A trial of objective comparison of quality of life between chronic renal failure patients treated with hemodialysis and renal transplantation. *Ann Transplant*. 2003;8(2):47-53.
43. Tucker CM, Ziller RC, Smith WR, Mars DR, Coons MP. Quality of life of patients on in-center hemodialysis versus continuous ambulatory peritoneal dialysis. *Perit Dial Int*. 1991;11(4):341-346.
44. Van Den Ham ECH, Kooman JP, Schols AMWJ, et al. Similarities in skeletal muscle strength and exercise capacity between renal transplant and hemodialysis patients. *American Journal of Transplantation*. 2005;5(8):1957-1965.
45. Wolcott DL, Nissenson AR. Quality of life in chronic dialysis patients: a critical comparison of continuous ambulatory peritoneal dialysis (CAPD) and hemodialysis. *Am J Kidney Dis*. May 1988;11(5):402-412.
46. Wu AW, Fink NE, Marsh-Manzi JVR, et al. Changes in Quality of Life during Hemodialysis and Peritoneal Dialysis Treatment: Generic and Disease Specific Measures. *Journal of the American Society of Nephrology*. 2004;15(3):743-753.
