# Supplementary material
Source: PubMed Central journal article supplement (PMC3809150)
Supplement: NIHMS486330-supplement-04.pdf [file NIHMS486330-supplement-04.pdf]

**Table S4.** Detailed Description of Outcome Measures

| Name of Outcome Measure                                           | Validated | Outcome Type | Range of Scores | Is Higher Score Better | Study Citations             |
|-------------------------------------------------------------------|-----------|--------------|-----------------|------------------------|-----------------------------|
| <b>Physical Function Measures</b>                                 |           |              |                 |                        |                             |
| Author-developed difficulties in activities of daily living scale | Yes       | Mean Score   | 1-7             | No                     | 1                           |
| CHEQ Role Physical Subscale (Original/Thai versions)              | Yes       | Mean Score   | 0-100           | Yes                    | 2                           |
| EuroQol 5D (EQ-5D)                                                | Yes       | Likert Scale | Yes/No          | N/A                    | 3                           |
| Karnofsky self-report                                             | Yes       | Mean Score   | 0-100           | Yes                    | 4,5                         |
| Hemodialysis Stressor Scale by Baldree et al (limitations)        | Yes       | Mean Score   | 1-5             | Yes                    | 6                           |
| Human Activity Profile Score (Maximum Activity Score)             | Yes       | Percentage   | 1-94            | Yes                    | 7                           |
| Nottingham Extended Activities of Daily Living Scale              | Yes       | Mean Score   | 0-60            | Yes                    | 8                           |
| SF-36 Physical Functioning Subscale (Original/Greek/Thai)         | Yes       | Mean Score   | 0-100           | Yes                    | 2, 9-25                     |
| SF-36 Role Physical Subscale (Original/Thai/Greek versions)       | Yes       | Mean Score   | 0-100           | Yes                    | 2, 9-25                     |
| Sickness Impact Profile                                           | Yes       | Mean Score   | 0-100           | Yes                    | 26                          |
| Symptom-limited graded cycle- ergometry test                      | Yes       | Mean Score   | 1-5             | Yes                    | 27                          |
| WHOQOL-100                                                        | Yes       | Mean Score   | 4-20            | Yes                    | 28                          |
| WHOQOL-BREF-TAIWAN Scale (physical health)                        | Yes       | Mean Score   | 1-5             | Yes                    | 29                          |
| Author-developed physical well-being scale (summary score)        | No        | Mean Score   | 1-5             | Yes                    | 30                          |
| Author-developed scale (difficulties with daily living score)     | No        | Mean Score   | 1-5             | Yes                    | 30                          |
| Patient reported part time employment (%)                         | No        | Percentage   | 0-100           | Yes                    | 31                          |
| Physical well-being scale developed by Simmons (summary)          | No        | Mean Score   | 1-5             | Yes                    | 32                          |
| Satisfaction with life questionnaire (physical function)          | No        | Mean Score   | 1-5             | Yes                    | 33                          |
| Satisfaction with physical performance (%)                        | No        | Percentage   | 0-100           | Yes                    | 33                          |
| <b>Recreation Measures</b>                                        |           |              |                 |                        |                             |
| CHEQ (Original/Thai) - Limitations to Pastimes and Recreation     | Yes       | Mean Score   | 1-100           | Yes                    | 9,10                        |
| Intrusiveness Ratings Scale (recreation and social activities)    | Yes       | Mean Score   | 1-7             | No                     | 1                           |
| Quality of Life Assessment Battery (mean recreation/week)         | Yes       | Mean Score   | 1-7             | No                     | 34                          |
| SF-36 Social Functioning Subscale (Original/Greek version)        | Yes       | Mean Score   | 1-100           | Yes                    | 10-13, 16, 18-20, 22-25, 35 |
| Sickness Impact Profile (recreation and pastimes)                 | Yes       | Mean Score   | 1-100           | No                     | 36                          |
| Author developed patient questionnaire (recreation)               | No        | Mean Score   | 1-10            | Yes                    | 37                          |
| Author developed social well-being scale (recreation score)       | No        | Mean Score   | 1-5             | Yes                    | 30                          |
| <b>Freedom Measures</b>                                           |           |              |                 |                        |                             |

|                                                                |     |            |       |     |       |
|----------------------------------------------------------------|-----|------------|-------|-----|-------|
| CHEQ – Freedom (Original/Thai versions)                        | Yes | Mean Score | 1-100 | Yes | 9,10  |
| EQ-5D (usual activities)                                       | Yes | Percentage | 1-100 | No  | 10    |
| Index of Well-Being (tied-down, free)                          | Yes | Mean Score | 1-7   | Yes | 38    |
| Intrusiveness Ratings Scale (recreation and social activities) | Yes | Mean Score | 1-7   | No  | 1     |
| Renal Treatment Satisfaction Questionnaire                     | Yes | Mean Score | 1-7   | Yes | 39    |
| SF-36 Social Functioning Subscale (Original/Greek versions)    | Yes | Mean Score | 1-100 | Yes | 11,16 |
| Sickness Impact Profile (recreation and pastimes)              | Yes | Mean Score | 1-100 | No  | 36    |
| WHOQOL-100 (environment)                                       | Yes | Mean Score | 4-20  | Yes | 28    |
| Author developed patient questionnaire (independence)          | No  | Mean Score | 1-10  | Yes | 37    |
| Author-developed scale (recreation satisfaction score)         | No  | Mean Score | 1-5   | Yes | 30    |
| Author-developed social well-being scale (doing most things)   | No  | Mean Score | 1-5   | Yes | 30    |
| <b>Work Measures</b>                                           |     |            |       |     |       |
| CHEQ - Limitations to work (Original/Thai versions)            | Yes | Mean Score | 1-100 | Yes | 9,10  |
| KDQOL (work status)                                            | Yes | Mean Score | 0-100 | Yes | 10,40 |
| Intrusiveness Ratings Scale (work and finances)                | Yes | Mean Score | 1-7   | No  | 1     |
| Sickness Impact Profile (work)                                 | Yes | Mean Score | 1-100 | No  | 36    |
| WHOQOL-100 (working capacity)                                  | Yes | Mean Score | 4-20  | Yes | 28    |
| Author-developed scale (job situation satisfaction score)      | No  | Mean Score | 1-5   | Yes | 30    |
| Author developed social well-being scale (job satisfaction)    | No  | Mean Score | 1-5   | Yes | 30    |
| Patient reported ability to work (%)                           | No  | Percentage | 0-100 | Yes | 41    |
| Patient reported employment status (% working)                 | No  | Percentage | 0-100 | Yes | 42    |
| Patient reported full time employment (%)                      | No  | Percentage | 0-100 | Yes | 31    |
| Patient reported working or looking for work (%)               | No  | Percentage | 0-100 | Yes | 43    |

## Citations

1. Devins GM, Mandin H, Hons RB, et al. Illness intrusiveness and quality of life in end-stage renal disease: comparison and stability across treatment modalities. *Health Psychol.* 1990;9(2):117-142
2. Aiyasanon N, Premasathian N, Nimmannit A, Jetanavanich P, Sritippayawan S. Validity and reliability of CHOICE Health Experience Questionnaire: Thai version. *J Med Assoc Thai.* Sep 2009;92(9):1159-1166.
3. Borowiak E, Braksator E, Nowicki M, Kostka T. Quality of life of chronic hemodialysis and peritoneal dialysis patients. *Clinical and Experimental Medical Letters.* 2009;50(1):37-42.
4. Tell GS, Mittelmark MB, Hylander B, Shumaker SA, Russell G, Burkart JM. Social support and health-related quality of life in black and white dialysis patients. *ANNA J.* Jun 1995;22(3):301-308; discussion 309-310.

5. Wolcott DL, Nissenson AR. Quality of life in chronic dialysis patients: a critical comparison of continuous ambulatory peritoneal dialysis (CAPD) and hemodialysis. *Am J Kidney Dis*. May 1988;11(5):402-412.
6. Lok P. Stressors, coping mechanisms and quality of life among dialysis patients in Australia. *J Adv Nurs*. May 1996;23(5):873-881.
7. Johansen KL, Chertow GM, Kutner NG, Dalrymple LS, Grimes BA, Kaysen GA. Low level of self-reported physical activity in ambulatory patients new to dialysis. *Kidney Int*. Dec 2010;78(11):1164-1170.
8. Alavi NM, Aliakbarzadeh Z, Sharifi K. Depression, anxiety, activities of daily living, and quality of life scores in patients undergoing renal replacement therapies. *Transplant Proc*. Nov 2009;41(9):3693-3696.
9. Wu AW, Fink NE, Marsh-Manzi JVR, et al. Changes in Quality of Life during Hemodialysis and Peritoneal Dialysis Treatment: Generic and Disease Specific Measures. *Journal of the American Society of Nephrology*. 2004;15(3):743-753.
10. Lee AJ, Morgan CL, Conway P, Currie CJ. Characterisation and comparison of health-related quality of life for patients with renal failure. *Curr Med Res Opin*. Nov 2005;21(11):1777-1783.
11. Basok EK, Atsu N, Rifaioğlu MM, Kantarci G, Yildirim A, Tokuc R. Assessment of female sexual function and quality of life in predialysis, peritoneal dialysis, hemodialysis, and renal transplant patients. *Int Urol Nephrol*. 2009;41(3):473-481.
12. Carmichael P, Popoola J, John I, Stevens PE, Carmichael AR. Assessment of quality of life in a single centre dialysis population using the KDQOL-SF questionnaire. *Qual Life Res*. Mar 2000;9(2):195-205.
13. Diaz-Buxo JA, Lowrie EG, Lew NL, Zhang H, Lazarus JM. Quality-of-life evaluation using Short Form 36: comparison in hemodialysis and peritoneal dialysis patients. *Am J Kidney Dis*. 2000 Feb;35(2):293-300.
14. Fujisawa M, Ichikawa Y, Yoshiya K, et al. Assessment of health-related quality of life in renal transplant and hemodialysis patients using the SF-36 health survey. *Urology*. Aug 1 2000;56(2):201-206.
15. Khan IH, Garratt AM, Kumar A, et al. Patients' perception of health on renal replacement therapy: Evaluation using a new instrument. *Nephrology Dialysis Transplantation*. 1995;10(5):684-689.
16. Kontodimopoulos N, Pappa E, Niakas D. Gender- and age-related benefit of renal replacement therapy on health-related quality of life. *Scand J Caring Sci*. Dec 2009;23(4):721-729.
17. Kutner NG, Zhang R, Barnhart H, Collins AJ. Health status and quality of life reported by incident patients after 1 year on haemodialysis or peritoneal dialysis. *Nephrol Dial Transplant*. Oct 2005;20(10):2159-2167.
18. Manns B, Johnson JA, Taub K, Mortis G, Ghali WA, Donaldson C. Quality of life in patients treated with hemodialysis or peritoneal dialysis: what are the important determinants? *Clin Nephrol*. Nov 2003;60(5):341-351.
19. Merkus MP, Jager KJ, Dekker FW, de Haan RJ, Boeschoten EW, Krediet RT. Physical symptoms and quality of life in patients on chronic dialysis: results of The Netherlands Cooperative Study on Adequacy of Dialysis (NECOSAD). *Nephrol Dial Transplant*. May 1999;14(5):1163-1170.
20. Ogutmen B, Yildirim A, Sever MS, et al. Health-related quality of life after kidney transplantation in comparison intermittent hemodialysis, peritoneal dialysis, and normal controls. *Transplant Proc*. Mar 2006;38(2):419-421.
21. Thong MS, van Dijk S, Noordzij M, et al. Symptom clusters in incident dialysis patients: associations with clinical variables and quality of life. *Nephrol Dial Transplant*. Jan 2009;24(1):225-230.
22. Baiardi F, Esposti ED, Cocchi R, et al. Effects of clinical and individual variables on quality of life in chronic renal failure patients. *Journal of Nephrology*. 2002;15(1):61-67.

23. Apostolou T, Hutchison AJ, Boulton AJM, et al. Quality of life in CAPD, transplant, and chronic renal failure patients with diabetes. *Renal Failure*. 2007;29(2):189-197.
24. Ibrahim N, Chiew-Tong NK, Desa A. Symptoms and health-related quality of life in patients with hemodialysis and continuous ambulatory peritoneal dialysis. *Research Journal of Medical Sciences*. 2011;5(5):252-256.
25. Sayin A, Mutluay R, Sindel S. Quality of Life in Hemodialysis, Peritoneal Dialysis, and Transplantation Patients. *Transplantation Proceedings*. 2007;39(10):3047-3053.
26. Jofre R, Lopez-Gomez JM, Moreno F, Sanz-Guajardo D, Valderrabano F. Changes in quality of life after renal transplantation. *Am J Kidney Dis*. Jul 1998;32(1):93-100.
27. Van Den Ham ECH, Kooman JP, Schols AMWJ, et al. Similarities in skeletal muscle strength and exercise capacity between renal transplant and hemodialysis patients. *American Journal of Transplantation*. 2005;5(8):1957-1965.
28. Tomasz W, Piotr S. A trial of objective comparison of quality of life between chronic renal failure patients treated with hemodialysis and renal transplantation. *Ann Transplant*. 2003;8(2):47-53.
29. Niu SF, Li IC. Quality of life of patients having renal replacement therapy. *J Adv Nurs*. Jul 2005;51(1):15-21.
30. Simmons RG, Anderson CR, Abress LK. Quality of life and rehabilitation differences among four end-stage renal disease therapy groups. *Scand J Urol Nephrol Suppl*. 1990;131:7-22.
31. Panagopoulou A, Hardalias A, Berati S, Fourtounas C. Psychosocial issues and quality of life in patients on renal replacement therapy. *Saudi J Kidney Dis Transpl*. Mar 2009;20(2):212-218.
32. Pietrabissa A, Ciaramella A, Carmellini M, et al. Effect of kidney transplantation on quality of life measures. *Transpl Int*. 1992;5 Suppl 1:S708-710.
33. Koch U, Muthny FA. Quality of life in patients with end-stage renal disease in relation to the method of treatment. *Psychother Psychosom*. 1990;54(2-3):161-171.
34. Tucker CM, Ziller RC, Smith WR, Mars DR, Coons MP. Quality of life of patients on in-center hemodialysis versus continuous ambulatory peritoneal dialysis. *Perit Dial Int*. 1991;11(4):341-346.
35. Merkus MP, Jager KJ, Dekker FW, et al. Quality of life in patients on chronic dialysis: Self-assessment 3 months after the start of treatment. *American Journal of Kidney Diseases*. 1997;29(4):584-592.
36. Hart LG, Evans RW. The functional status of ESRD patients as measured by the Sickness Impact Profile. *J Chronic Dis*. 1987;40 Suppl 1:117S-136S.
37. Juergensen E, Wuerth D, Finkelstein SH, Juergensen PH, Bekui A, Finkelstein FO. Hemodialysis and peritoneal dialysis: patients' assessment of their satisfaction with therapy and the impact of the therapy on their lives. *Clin J Am Soc Nephrol*. Nov 2006;1(6):1191-1196.
38. Bremer BA, McCauley CR, Wrona RM, Johnson JP. Quality of life in end-stage renal disease: a reexamination. *Am J Kidney Dis*. Mar 1989;13(3):200-209.
39. Barendse SM, Speight J, Bradley C. The Renal Treatment Satisfaction Questionnaire (RTSQ): a measure of satisfaction with treatment for chronic kidney failure. *Am J Kidney Dis*. Mar 2005;45(3):572-579.
40. Molsted S, Prescott L, Heaf J, Eidemak I. Assessment and clinical aspects of health-related quality of life in dialysis patients and patients with chronic kidney disease. *Nephron Clin Pract*. 2007;106(1):c24-33.
41. Evans RW, Manninen DL, Garrison LP, Jr., et al. The quality of life of patients with end-stage renal disease. *N Engl J Med*. Feb 28 1985;312(9):553-559.

42. Holley JL, Nespor S. An analysis of factors affecting employment of chronic dialysis patients. *Am J Kidney Dis.* May 1994;23(5):681-685.

43. Julius M, Kneisley JD, Carpentier-Alting P, Hawthorne VM, Wolfe RA, Port FK. A comparison of employment rates of patients treated with continuous ambulatory peritoneal dialysis vs in-center hemodialysis (Michigan End-Stage Renal Disease Study). *Arch Intern Med.* Apr 1989;149(4):839-842.
